# Supplementary material
Source: Springer Nature journal article supplement (https://www.springermedizin.de/resource/supplementary/12882_2012_275_MOESM5_ESM.pdf/9453418)

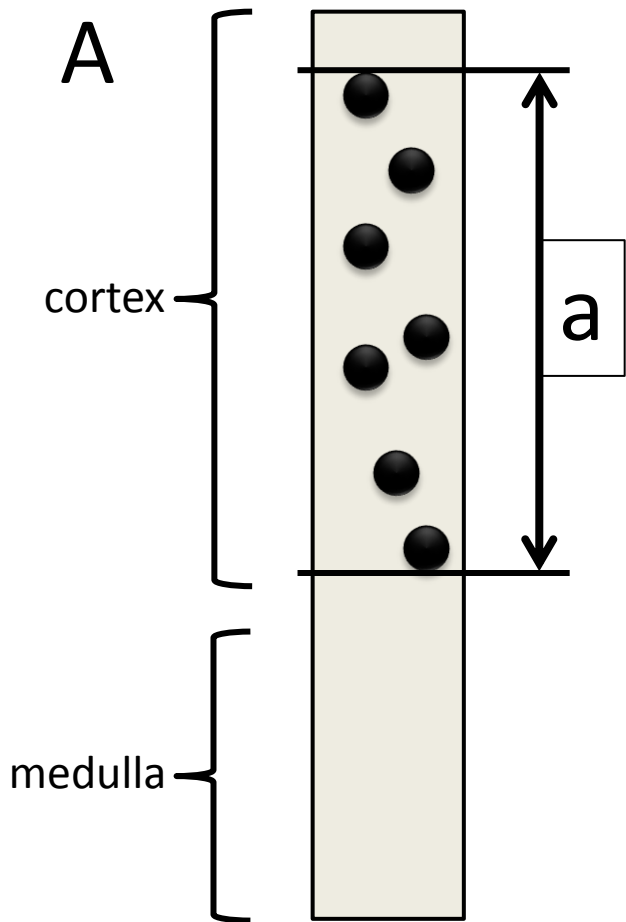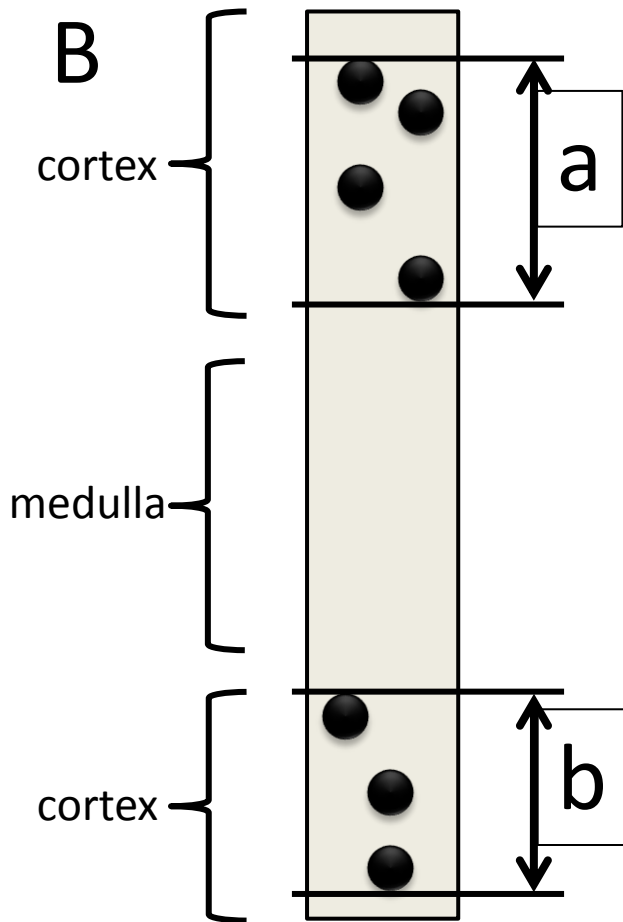

Supplement: MOESM5 [file 9453418]
